# Supplementary material for: A MademoiseLLE domain binding platform links the key RNA transporter to endosomes
Source: PLoS Genet. 2022 Jun 21;18(6):e1010269. doi: 10.1371/journal.pgen.1010269 (PMC9249222; doi:10.1371/journal.pgen.1010269)
Supplement: S1 Spreadsheet — (XLSX) [file pgen.1010269.s020.xlsx]

## Sheet: Uni-bipolar Fig 4C
Unipolar/bipolar hyphae for Figure 4C
Total numbers	unipolar + septa			unipolar			bipolar + septa			bipolar
Replicate	1	2	3	1	2	3	1	2	3	1	2	3
wt	105	92	49	25	15	21	0	1	0	1	0	2
upa1-gfp/rrm4D	1	0	0	114	84	64	0	2	3	41	57	62
upa1-gfp/rrm4-kat	76	88	79	23	2	15	1	0	2	3	0	0
upa1-gfp/rrm4-m1D-kat	112	81	103	41	11	14	0	0	0	1	0	0
upa1-gfp/rrm4-m2D-kat	83	54	64	3	32	73	2	1	0	0	0	2
upa1-gfp/rrm4-m3D-kat	0	0	0	105	76	92	1	6	0	37	33	50
Percentage	unipolar + septa			unipolar			bipolar + septa			bipolar
Replicate	1	2	3	1	2	3	1	2	3	1	2	3
wt	80.1527	85.1852	68.0556	19.084	13.8889	29.1667	0	0.925926	0	0.763359	0	2.77778
upa1-gfp/rrm4D	0.641026	0	0	73.0769	58.7413	49.6124	0	1.3986	2.32558	26.2821	39.8601	48.062
upa1-gfp/rrm4-kat	73.7864	97.7778	82.2917	22.3301	2.22222	15.625	0.970874	0	2.08333	2.91262	0	0
upa1-gfp/rrm4-m1D-kat	72.7273	88.0435	88.0342	26.6234	11.9565	11.9658	0	0	0	0.649351	0	0
upa1-gfp/rrm4-m2D-kat	94.3182	62.069	46.0432	3.40909	36.7816	52.518	2.27273	1.14943	0	0	0	1.43885
upa1-gfp/rrm4-m3D-kat	0	0	0	73.4266	66.087	64.7887	0.699301	5.21739	0	25.8741	28.6957	35.2113

## Sheet: Co-localisation Fig 4E
Co-localisation of processive signals for Figure 4E
Percantage	Co-localisation
Replicate	1	2	3
upa1-gfp/rrm4-kat	100	98	97
upa1-gfp/rrm4-m1D-kat	96	98	95
upa1-gfp/rrm4-m2D-kat	95	97	100
upa1-gfp/rrm4-m3D-kat	0	0	0

## Sheet: Rrm4 and Upa1 signals S7A Fig
Number of Rrm4-Kat and Upa1-Gfp signals shown in S7A Figure
Total signal number/ 10 µm	Rrm4-Kat signals				Upa1-Gfp signals
Replicate	upa1-gfp/rrm4-kat	upa1-gfp/rrm4-m1D-kat	upa1-gfp/rrm4-m2D-kat	upa1-gfp/rrm4-m3D-kat	upa1-gfp/rrm4-kat	upa1-gfp/rrm4-m1D-kat	upa1-gfp/rrm4-m2D-kat	upa1-gfp/rrm4-m3D-kat
1	6	6	10.5		3	5	7	9
	3	7	7		8	6.5	11	9
	8	6.5	11		7	5.5	5.5	9.5
	7	5.5	5.5		6	9.5	6.5	6.5
	6	9	6.5		6	8	6.5	5
	6	8	6.5		10	7	9	7.5
	10	8.5	9		6	7.5	9	8.5
	6	7.5	9		9	9.5	10	8.5
2	9	9.5	10		7	4.5	10	6.5
	8	4.5	10		7.5	10.5	7	13
	7.5	10.5	7		10	8.5	4.5	6.5
	10	8.5	4.5		11.5	8.5	8.5	6
	11.5	9	8.5		8	5.5	6	7.5
	8	5.5	6		7	8.5	7	6
	9	8.5	7		4.5	4.5	6	12
	10.5	4.5	6		4.5	7.5	10	9.5
	4.5	7.5	10		6.5	7	7.5	7
3	6.5	7	7.5		4.5	8	9.5	6
	4.5	8	9.5		2.5	11	11.5	9
	2.5	10	10		5	6	7	6.5
	4	6	7		7	5	7	10
	7	5	9		6	7	10.5	8.5
	6	7	7		9	6.5	6	7
	10	6	6		7	8	9	8
	8.5	12	8		8.5	7	8	5.5

## Sheet: Rrm4 and Upa1 velocity S7B Fig
Velocities of Rrm4-Kat and Upa1-Gfp signals shown in S7B Figure
Velocities [µm/s]	Rrm4-Kat signals				Upa1-Gfp signals
	upa1-gfp/rrm4-kat	upa1-gfp/rrm4-m1D-kat	upa1-gfp/rrm4-m2D-kat	upa1-gfp/rrm4-m3D-kat	upa1-gfp/rrm4-kat	upa1-gfp/rrm4-m1D-kat	upa1-gfp/rrm4-m2D-kat	upa1-gfp/rrm4-m3D-kat
	1.75573	2.58893	1.94525		1.80871	2.59415	1.84563	1.88839		Replicate 1
	1.54469	2.59728	2.11446		1.66469	2.52968	1.60524	2.47125		Replicate 2
	1.72515	2.43626	2.1426		1.7006	1.93437	2.40248	2.52787		Replicate 3
	1.69778	2.44632	2.52626		2.57066	2.55553	2.46442	1.91337
	2.45812	2.55308	1.54482		2.37547	1.96048	1.49599	1.39723
	1.6475	1.88839	1.40421		1.64326	2.6527	2.03414	2.69427
	1.67345	2.57436	1.17298		1.466	2.38145	2.83199	2.31708
	1.88839	2.21383	1.77887		4.9425	2.40868	1.73999	1.89659
	1.81008	1.33285	1.75983		1.70166	1.5272	2.22731	1.78479
	2.90237	2.35062	1.69585		1.82059	1.7051	2.04012	1.62675
	1.73781	1.75344	1.42242		2.19813	2.4931	2.03088	2.0259
	1.94368	2.37286	2.30219		3.26626	2.33344	2.08939	1.78782
	1.52514	3.3469	1.81297		1.26626	2.27711	2.05981	2.46293
	2.15337	1.58425	1.66494		1.41254	2.34675	1.99927	1.9655
	1.63088	1.55924	1.92208		3.47512	2.52165	1.81752	2.77351
	1.60227	1.8781	1.35787		2.52188	2.47026	2.25272	3.30183
	1.58866	2.00053	1.47459		2.0851	3.72157	1.48524	2.63713
	2.05874	1.79376	2.38491		1.87997	1.32914	1.44967	2.8755
	2.12944	1.75694	1.99927		2.29381	2.15073	1.80155	2.01965
	2.09994	2.0862	1.60197		5.68028	3.46412	1.67039	1.54431
	1.80871	1.09619	1.94561		1.81559	2.06024	1.88412	2.8604
	1.66469	2.59415	1.76555		2.23752	2.54103	2.57468	1.32368
	1.7006	2.52968	2.7081		3.98696	2.06006	2.3476	2.53481
	4.57066	1.93437	2.31564		2.57507	1.93211	1.96553	1.15137
	2.37547	2.55553	1.69898		2.10056	1.87534	1.53439	2.28707
	1.64326	1.96048	1.63088		3.74029	2.37303	1.54444	1.96612
	1.466	2.6527	1.86828		2.91246	2.36072	2.60941	1.70687
	4.9425	2.38145	2.27465		2.09181	2.12528	2.4034	2.05294
	1.70166	2.40868	2.03414		2.05963	2.58462	1.85344	0.018878
	1.82059	1.5272	2.23173		2.05884	0.986701	1.93744	2.92617
	2.19813	1.7051	1.78297		2.02303	2.14044	2.44977	1.48924
	1.26626	2.4931	1.9564		1.95689	2.45445	1.37909	2.71738
	1.26626	2.33344	1.7643		1.59898	2.05953	3.26176	1.81752
	1.41254	2.27711	2.57507		2.01513	2.0163	1.58365	2.83258
	1.47512	2.34675	2.84564		1.98108	3.13501	1.94453	2.57614
	1.52188	2.52165	1.60524		1.76205	2.74085	1.88366	2.17678
	2.0851	2.47026	2.40248		1.27776	1.61808	2.00339	2.4034
	1.87997	3.72157	2.46442		3.71549	2.54315	1.96432	2.49332
	2.29381	1.32914	1.49599		3.67324	2.0597	2.15337	2.90372
	1.68028	2.15073	2.03414		1.54504	2.36907	1.01323	2.43202
	1.81559	3.46412	2.83199		1.23562	1.75179	2.4411	2.96676
	2.23752	2.06024	1.73999		1.92768	1.69983	2.73545	1.9084
	1.98696	2.54103	2.22731		2.32481	2.66516	2.94224	1.4389
	2.57507	2.06006	2.04012		1.46092	2.69358	2.40207	2.69171
	2.10056	1.93211	2.03088		2.09994	2.36828	1.67551	2.04785
	1.74029	1.87534	2.08939		1.69941	2.46545	1.69356	2.34212
	1.91246	2.37303	2.05981		2.8024	2.57433	1.80187	2.40309
	2.09181	2.36072	1.99927		2.14175	1.94453	1.43811	2.35491
	2.05963	2.12528	1.81752		2.0602	1.32464	1.7589	1.48402
	2.05884	2.58462	2.25272		2.28832	1.78723	1.94071	2.92431
	2.02303	0.986701	1.48524		1.87868	2.01573	2.6215	2.76193
	1.95689	2.14044	1.44967		3.74569	3.38519	2.6215	2.18183
	1.59898	2.45445	1.80155		2.10025	2.35395	1.79526	2.64251
	2.01513	2.05953	1.67039		1.73206	1.94947	2.80875	2.66387
	1.98108	2.0163	1.88412		2.01859	1.4714	2.02438	1.13301
	1.76205	3.13501	2.57468		1.62283	2.28282	1.48036	2.30361
	1.27776	2.74085	2.3476		1.98461	2.12181	1.83912	2.3773
	1.71549	1.61808	1.96553		1.95462	2.70541	1.92043	1.28023
	1.67324	2.54315	6.53439		4.7034	2.76457	2.47223	1.57441
	4.54504	2.0597	1.54444		2.27671	2.45187	2.42764	2.76506
	1.23562	2.36907	2.60941		2.09226	2.37638	2.06055	2.90581
	1.92768	1.75179	2.4034		2.15337	1.86897	2.21796	2.33447
	2.32481	1.69983	1.85344		1.89403	2.00924	1.45205	2.62636
	1.46092	5.66516	1.93744		4.74268	2.92771	1.52569	2.75341
	2.09994	2.69358	2.44977		1.63936	2.54103	2.09914	2.88312
	1.69941	2.36828	1.37909		2.84909	2.65759	1.49342	1.00842
	1.8024	2.46545	3.26176		1.89157	2.05664	1.89759	0.772201
	2.14175	2.57433	1.58365		1.31945	2.18904	2.11611	2.6389
	2.0602	1.94453	1.94453		2.92771	2.52078	1.49754	2.88312
	2.28832	1.32464	1.88366		1.88171	2.27076	2.27304	1.72592
	1.87868	1.78723	2.00339		2.05984	2.17092	2.00549	3.23616
	1.74569	2.01573	1.96432		1.77887	1.94711	1.77296	2.50057
	2.10025	3.38519	2.15337		1.7524	2.72628	1.42638	2.32525
	1.73206	2.35395	3.01323		1.98716	2.00053	2.83199	2.09323
	2.01859	1.94947	2.4411		2.08809	2.85961	2.02154	2.22421
	1.62283	1.4714	2.73545		1.59733	2.08361	2.12594	2.16234
	1.98461	2.28282	2.94224		1.88339	2.0868	1.69139	3.69094
	1.95462	2.12181	2.40207		3.59497	2.1453	2.11611	2.69778
	1.7034	2.70541	1.67551		1.75694	1.84806	1.61318	3.32157
	2.27671	2.76457	1.69356		2.70411	2.94041	2.34488	2.47223
	2.09226	2.45187	1.80187		2.2849	2.40304	1.30923	3.97108
	2.15337	2.37638	1.43811		1.95689	1.47182	1.73781	2.4034
	1.89403	1.86897	1.7589		2.01406	2.10608	1.73781	2.83023
	1.74268	2.00924	1.94071		1.75927	2.42888	1.26995	2.82814
	1.63936	2.92771	2.6215		1.47637	2.24465	1.76618	2.47125
	4.84909	2.54103	2.6215		2.18102	2.9428	2.00284	2.5755
	1.89157	2.65759	1.79526		4.3299	2.54911	2.26682	2.81927
	1.31945	2.05664	2.80875		2.26682	3.04969	1.30427	2.14589
	2.92771	2.18904	2.02438		1.5146	2.57614	2.11583	2.28769
	1.88171	2.52078	1.48036		1.35919	2.57422	2.36139	3.03534
	2.05984	2.27076	1.83912		2.48232	1.34713	2.18863	2.62412
	1.77887	2.17092	1.92043		2.26037	2.36828	2.65266	2.83199
	1.7524	1.94711	2.47223		3.49305	2.4556	2.19425	2.89635
	1.98716	2.72628	2.42764		2.21779	2.73381	1.64816	1.4328
	2.08809	2.00053	2.06055		1.86231	1.71576	1.56195	2.7775
	1.59733	2.85961	2.21796		2.12802	3.2285	2.38056	2.51925
	1.88339	2.08361	1.45205		1.51807	2.48924	1.81811	1.37337
	1.59497	2.0868	1.52569		1.39343	2.33767	2.47697	2.16306
	1.75694	2.1453	2.09914		2.23099	3.57446	2.65778	1.95985
	2.70411	1.84806	1.49342		1.50181	2.42097	2.29761	2.24161
	2.2849	9.94041	1.89759		1.86806	2.17835	2.7912	2.56024
	4.40379	2.40304	2.11611		1.43697	2.67108	2.43733	2.80875
	3.19203	1.47182	1.49754		1.80228	3.22635	1.94947	2.66931
	3.3705	2.10608	2.27304		1.76534	2.16342	2.94785	2.54311
	2.20387	2.42888	2.00549		2.05975	1.39261	2.68303	2.39167
	2.67719	2.24465	1.77296		1.60695	2.70327	1.33878	2.47372
	4.40917	2.9428	1.42638		1.9734	2.22501	2.74675	2.22172
	2.43693	2.54911	2.83199		3.15869	2.13596	2.05874	2.63649
	2.77351	3.04969	2.02154		2.34927	1.23562	2.85056	2.34407
	3.52223	2.57614	2.12594		5.49305	2.36403	2.34862	1.57329
	2.48232	2.57422	1.69139		2.26034	2.01947	3.03109	2.95404
	2.26037	1.34713	2.11611		1.94525	2.42548	2.17793	2.70351
	1.49305	2.36828	1.61318		2.26621	1.71631	2.44632	2.5013
	2.21779	2.4556	2.34488		1.54489	1.0935	1.86654	2.40207
	1.86231	2.73381	3.30924		1.92359	1.97607	2.12663	2.33551
	2.12802	1.71576	1.75847		2.38145	2.29963	1.70286	2.25272
	1.51807	3.2285	1.73781		2.97509	1.99424	2.61452	2.4042
	1.39343	2.48924	1.26995		2.5015	2.57468	1.2017	0.633945
	2.23099	2.33767	1.76618		1.89286	2.00889	2.40283	1.91064
	1.50181	3.57446	2.00284		2.04443	2.85556	1.69094	2.67719
	1.86806	2.42097	2.26682		2.25237	2.44429	2.18294	2.18102
	1.43697	2.17835	1.30427		1.86477	2.35379	2.64852	1.60909
	1.80228	2.67108	2.11583		1.8499	2.68952	2.36828	2.64739
	1.76534	3.22635	2.36139		2.48322	1.79123	2.05937	2.03818
	2.05975	2.16342	2.18863		2.53578	2.57441	3.27687	3.19986
	1.60695	1.39261	2.65266		1.73625	3.27154	3.81365	2.12399
	1.9734	2.70327	2.19425		2.08867	2.5525	2.74594	3.18529
	1.15869	2.22501	1.64816		2.28551	2.74492	2.24161	2.96072
	2.34927	2.13596	1.56195		1.77665	2.49214	2.18581	2.89635
	1.49305	1.23562	2.38056		2.10469	2.20251	2.24841	2.47619
	2.26034	2.36403	1.81811		1.82189	1.69635	2.89726	2.79513
	1.94525	2.01947	2.47697		1.52921	2.6323	2.51959	2.15496
	2.26621	2.42548	2.65778		1.56759	2.93945	3.44237	2.83111
	1.54489	1.71631	2.29761		1.4484	1.52753	2.14719	2.97259
	1.92359	1.0935	2.7912		1.8725	2.47195	4.11926	2.43134
	2.38145	1.97607	2.43733		2.5202	1.96612	3.17592	3.4017
	2.97509	2.29963	1.94947		1.82341	1.70809	2.58967	2.7885
	2.5015	1.99424	2.94785		1.69602	1.20453	2.43774	3.75836
	4.89286	2.57468	2.68303		1.45451	1.94169	1.982	1.58999
	2.04443	2.00889	4.33878		2.73284	2.45724	1.96612	2.72628
	2.25237	2.85556	2.74675		1.8959	1.0887	2.07666	3.11232
	1.86477	2.44429	2.05874		2.69151	2.38577	2.11249	2.75154
	1.8499	2.35379	2.85056		1.75694	2.78438	2.87116	3.05457
	2.48322	2.68952	2.34862		2.22231	2.35156	2.56041	2.92083
	2.53578	1.79123	3.03109		2.26566	2.12802	2.4688	2.3968
	1.73625	2.57441	2.17793		2.05916	2.98609	1.73206	2.84975
	2.08867	3.27154	2.44632		1.58067	2.51017	2.18558	2.96862
	2.28551	2.5525	1.86654		1.8584	2.44958	2.39168	2.0966
	1.77665	2.74492	2.12663		1.9156	1.96576	2.47639	2.36737
	2.10469	2.49214	1.70286		1.78609	2.47708	1.85344	2.47207
	1.82189	2.20251	2.61452		2.45365	2.08361	2.85166	2.95765
	1.52921	1.69635	1.2017		2.36278	1.91848	2.20915	2.59367
	1.56759	2.6323	2.40283		1.52254	2.14916	2.12708	2.6657
	1.4484	2.93945	3.69094		2.636	2.75956	2.14947	2.07904
	2.8725	1.52753	2.18294		1.8447	1.15666	3.09524	2.94785
	2.5202	2.47195	2.64852		1.32369	1.24351	2.39086	1.97839
	1.82341	1.96612	2.36828		2.07904	2.81362	2.41427	3.99302
	1.69602	2.7081	2.05937		1.72163	2.46062	2.55717	2.23173
	1.45451	3.20453	3.27687		2.01053	2.9242	1.57366	2.84892
	2.73284	1.94169	3.81365		2.28132	2.35407	2.61265	11.3492
	1.8959	2.45724	2.74594		1.02969	2.85452	2.79171	2.36482
	2.69151	3.0887	2.24161		2.4034	1.12012	2.50663	2.5021
	1.75694	2.38577	2.18581		1.58704	2.57365	2.21306	3.08838
	2.22231	2.78438	2.24841		1.68936	2.70383	2.66995	2.40283
	2.26566	2.35156	2.89726		2.0862	2.3065	2.01339	2.94364
	2.05916	2.12802	2.51959		1.83912	2.12183	2.64301	2.38656
	1.58067	2.98609	3.44237		1.83912	2.1733	2.40995	2.61909
	1.8584	2.51017	2.14719		2.36482	1.96825	2.24018	2.41816
	1.9156	2.44958	4.11926		2.29381	2.43351	1.89979	1.8959
	1.78609	1.96576	3.17592		1.73781	1.06949	2.371	2.33678
	2.45365	2.47708	2.58967		2.34553	2.55124	2.53599	2.26581
	2.36278	2.08361	2.43774		1.63545	2.41597	2.29438	1.88427
	1.52254	1.91848	1.982		1.74246	2.47026	1.99927	2.6519
	2.636	2.14916	1.96612		1.8992	3.08906	2.85765	1.8725
	1.8447	2.75956	2.07666		2.20125	2.46017	1.93658	2.03053
	1.32369	3.15666	2.11249		2.35491	2.78154	2.64977	4.00994
	2.07904	3.24351	2.87116		1.41059	2.85906	2.10707	1.9585
	1.72163	2.81362	2.56041		2.03694	3.11665	2.22054	2.02745
	2.01053	2.46062	2.4688		1.56354	1.97524	2.23752	2.43134
	2.28132	2.9242	1.73206		3.08962	3.0292	2.05994	2.15618
	1.02969	2.35407	2.18558		1.88734	2.98088	1.65949	2.34675
	2.4034	2.85452	2.39168		1.2528	2.55989	2.61155	2.16306
	1.58704	4.12012	2.47639		1.71646	2.29611	2.18863	1.78175
	1.68936	2.57365	1.85344		1.6302	2.22412	1.99073	2.247
	2.0862	2.70383	2.85166		1.98827	2.38871	2.2887	1.57322
	1.83912	2.3065	2.20915		2.06006	3.00425	1.95706	2.05994
	1.85463	4.12183	2.12708		2.52787	1.56383	2.46811	1.8781
	2.36482	2.1733	2.14947		1.78916	2.36232	2.25954	2.50873
	2.29381	3.96825	3.09524		1.94561	2.05953	1.94356	2.33396
	1.73781	2.43351	2.39086		1.73167	2.74644	1.34915	2.08409
	2.34553	3.06949	2.41427		1.24699	2.88312	2.24852	2.45187
	1.63545	2.55124	2.55717		0.712824	2.98041	2.18392	2.92617
	4.74246	2.41597	1.57366		2.23173	2.31757	1.02999	2.94364
	1.8992	2.47026	2.61265		1.45086	1.42528	2.24256	2.11469
	2.20125	3.08906	2.79171		2.1669	2.05835	2.04637	2.14947
	2.35491	2.46017	2.50663		2.33722	2.80319	1.71636	2.11469
	2.41059	2.78154	2.21306		2.26531	2.62421	1.89979	2.14947
	2.03694	2.85906	2.66995		2.60241	2.4635	1.33379	2.24852
	1.56354	3.11665	2.01339		2.07809	1.20182	2.64206	2.247
	3.08962	1.97524	2.64301		2.08512	2.84975	2.23397	1.80105
	1.88734	3.0292	2.40995		1.644	2.47125	1.59162	2.85673
	1.2528	2.98088	2.24018		2.27969	3.27687	2.14175	2.05937
	3.71646	2.55989	1.89979		2.05937	1.39465	2.29629	2.67825
	1.6302	2.29611	2.371		2.19876	2.11086	1.64275	2.5009
	1.98827	2.22412	2.53599		2.57679	1.93656	2.08361	2.44581
	2.06006	2.38871	2.29438		2.15764	3.05217	1.67826	2.6323
	2.52787	3.00425	1.99927		2.96257	1.88839	3.39797	2.28895
	1.78916	1.56383	2.85765		2.14175	2.48394	2.35323	2.06024
	1.94561	2.36232	1.93658		2.59615	2.53011	2.79579	1.8424
	1.73167	2.05953	2.64977		1.71671	2.82562	2.54752	2.37286
	2.24699	2.74644	2.10707		2.1426	2.49075	1.96898	2.4619
	3.71282	2.88312	2.22054		2.33678	2.71241	2.43425	2.05937
	2.23173	2.98041	2.23752		1.31318	1.69199	2.30002	3.0097
	1.45086	2.31757	2.05994		1.85344	2.60854	2.45607	1.54472
	2.1669	1.42528	1.65949		1.66347	2.0893	2.61155	2.52787
	2.33722	2.05835	2.61155		1.81133	2.76763	2.2737	1.64791
	2.26531	2.80319	2.18863		1.7164	2.91842	2.05963	6.12918
	2.60241	2.62421	1.99073		1.95848	1.19214	2.23815	2.07997
	2.07809	2.4635	2.2887		2.0951	2.5021	1.92557	3.03286
	2.08512	3.20182	1.95706		1.09051	1.78723	2.21813	2.53513
	2.644	2.84975	2.46811		1.76408	1.83694	2.34367
	2.27969	2.47125	2.25954		2.03034	2.91074	1.57146
	2.05937	3.27687	1.94356		2.13097	1.30549	2.08909
	2.19876	3.39465	1.34915		2.2618	2.01899	2.27465
	2.57679	2.11086	2.24852		2.67719	3.19203	1.47719
	2.15764	3.93656	2.18392		2.21616	2.29381	1.68525
	2.96257	3.05217	1.02999		1.40012	2.81927	1.7397
	2.14175	1.88839	2.24256		1.40964	1.66926	2.18278
	2.59615	2.48394	2.04637		1.88804	2.28381	2.20445
	3.71672	2.53011	1.71636		1.77581	1.75694	1.76618
	2.1426	2.82562	1.89979		1.61318	2.09096	2.34488
	2.33678	2.49075	1.33379		1.8075	2.36048	2.1868
	1.31318	2.71241	2.64206		1.60909	2.61402	2.34927
	1.85344	1.69199	2.23397		2.11935	2.56178	1.50295
	1.66347	2.60854	1.59162		2.49775	3.14211	1.36794
	1.81133	3.0893	2.14175		2.46545	1.9297	1.52569
	1.7164	2.76763	2.29629		2.53215	2.51966	1.25045
	2.95848	2.91842	1.64275		1.96308	2.65712	1.96828
	2.0951	1.19214	2.08361		2.11669	2.87896	1.88427
	1.09051	2.5021	1.67826		2.16956	2.57462	2.23589
	1.76408	1.78723	3.39797		1.89342	2.23045	1.70928
	2.03034	1.83694	2.35323		2.79646	2.39495	2.09096
	2.13097	1.91074	2.79579		2.22785	3.33212	2.20201
	2.2618	1.30549	2.54752		1.50083	2.41692	1.83214
	2.67719	2.01899	1.96898		1.619	2.03571	1.6736
	2.21616	1.19203	2.43425		2.1806	3.43343	2.26212
	3.40012	2.29381	2.30002		1.6475	2.4556	1.66517
	1.40964	2.81927	2.45607		2.07666	1.69635	2.3968
	1.88804	1.66926	2.61155		1.41582	2.63181	1.98339
	1.77581	2.28381	2.2737		2.02339	3.22421	2.06032
	1.61318	1.75694	2.05963		2.72293	2.15337	2.57407
	2.8075	2.09096	2.23815		2.72293	3.12083	2.57507
	1.60909	2.36048	1.92557		2.26576	2.12158	2.58911
	2.11935	2.61402	2.21813		2.73723	2.39599	2.03088
	2.49775	2.56178	2.34367		2.15618	2.54994	1.91788
	2.46545	1.14211	1.57146		2.19715	1.37292	1.37312
	2.53215	1.9297	2.08909		1.70307	2.62463	2.10861
	1.96308	2.51966	2.27465		2.05975	2.90041	1.46206
	2.11669	2.65712	1.47719		2.14064	2.69358	1.9637
	2.16956	2.87896	1.68525		1.6036	2.31729	1.55562
	1.89342	2.57462	1.7397		1.48036	2.92364	2.01053
	2.79646	1.23045	2.18278		2.67719	4.19469	1.94303
	2.22785	2.39495	2.20445		2.71946	2.71512	2.17016
	1.50083	3.33212	1.76618		1.94827	2.1097	2.4034
	1.619	2.41692	2.34488		1.96308	2.64076	3.84289
	2.1806	2.03571	2.1868		2.27521	2.72222	2.3062
	1.6475	3.43343	2.34927		2.4718	2.67795	2.43912
	2.07666	2.4556	1.50295		1.50562	2.34769	2.80397
	3.41582	1.69635	1.36794		1.84727	4.34187	2.3076
	2.02339	2.63181	1.52569		2.25442	2.54994	2.04414
	2.72293	1.22421	1.25045		2.26588	3.83862	1.74872
	2.72293	2.15337	1.96828		1.99888	2.54994	1.60695
	2.26576	2.12083	1.88427		2.34062	3.83862	2.08594
	2.73723	2.12158	2.23589		1.69219	2.44734	1.94225
	2.15618	2.39599	1.70928		2.15546	2.56024	2.35156
	2.19715	2.54994	2.09096		2.63972	2.8062	2.31757
		1.37292	2.20201		2.13363	1.0302	1.38425
		2.62463	1.83214		2.21712	3.99302	2.19308
		2.90041	1.6736		2.01248	3.45329	2.05957
		2.69358	2.26212		2.324	2.4026	2.20955
		2.31729	1.66517		2.03818	2.34062	3.52016
		2.92364	2.3968		2.41552	2.49666	3.58895
		2.19469	1.98339		2.14378	2.51738	2.63763
		2.71512	2.06032		2.30855	3.04909	3.97544
		2.1097	2.57407		2.17678	2.74583	2.54646
		2.24076	2.57507		2.30294	2.6527	2.54646
		2.72222	2.58911		2.35847	2.247	2.64802
		2.67795	2.03088		2.42579	1.85791	2.11982
		2.34769	1.91788		2.20616	2.12997	2.24407
		1.34187	1.37312		2.81635	1.8744	1.73494
		2.54994	2.10861		2.31009	2.41084	2.11202
		3.83862	1.46206		2.30585	2.82443	1.51416
		2.54994	1.9637		2.05963	2.34105	1.56575
		2.83862	1.55562		2.19562	3.87317	1.63844
		2.44734	2.01053		1.8424	3.04281	1.57927
		2.56024	1.94303		2.22172	2.74633	2.10163
		2.8062	2.17016		2.84564	2.28225	2.05955
		1.0302	2.4034		1.58365	2.0326	1.56944
		3.99302	1.84289		2.6323	2.89984	2.20694
		3.45329	2.3062		2.49699	2.66831	3.96149
		2.4026	2.43912		2.15337	2.13262	2.26596
		2.34062	2.80397		2.15288	2.54158	1.74394
		2.49666	2.3076		2.29381	3.33618	1.94877
		2.51738	2.04414		2.38333	2.67254	2.79778
		3.04909	1.74872		2.24057	2.69923	1.97839
		2.74583	1.60695		2.6455	2.31742	3.91281
		2.6527	2.08594		1.6475	2.34963	2.27591
		2.247	1.94225		1.99371	2.35623	2.02485
		1.85791	2.35156		1.82259	2.00172	1.84298
		2.12997	2.31757		1.91064	2.16647	1.72308
		1.8744	1.38425		2.40273	2.09214	1.83846
		2.41084	2.19308		3.05841	2.58655	2.2908
		2.82443	2.05957		2.09994	2.31264	2.13858
		2.34105	2.20955		2.35435	2.00602	1.60663
		3.87317	1.52016		1.98696	2.75909	2.19484
		3.04281	3.58895		1.1643	2.16956	2.13465
		2.74633	2.63763		2.05916	3.20665	1.70683
		2.28225	1.97544		1.42208	3.04787	2.10656
		2.0326	2.54646		1.20453	2.17767	2.07734
		2.69984	2.54646		2.45926	2.74675	2.24649
		2.66831	2.64802		3.22281	2.66372	2.15618
		2.13262	2.11982		2.09474	1.96386	2.17835
		2.54158	2.24407		2.09546	2.17678	1.67449
		2.33618	1.73494		1.62608	2.26596	3.0194
		2.67254	2.11202		2.30219	2.70942	2.55647
		2.69923	1.51416		1.69635	2.31708	3.48782
		2.31742	1.56575		1.41629	2.66831	1.92208
		2.34963	1.63844		2.40207	2.24465	2.06032
		2.35623	1.57927		1.31723	2.51738	2.35028
		2.00172	2.10163		1.91291	2.19273	4.25064
		2.16647	2.05955		1.29152	2.36036	2.22659
		2.09214	1.56944		1.25016	2.62855	3.13464
		2.58655	2.20694		1.98108	2.36048	2.78687
		2.31264	1.96149		1.72816	1.90184	2.86492
		2.00602	2.26596		1.52512	3.78683	2.36072
		2.75909	1.74394		1.94877	2.22659	2.79447
		2.16956	1.94877		2.18836	2.7728	2.32667
		3.20665	2.79778		2.1974	4.56264	4.76111
		1.04787	1.97839		1.41723	2.574	2.39358
		2.17767	3.91281		1.27062	1.99927	2.04469
		2.24675	2.27591		2.4131	3.82128	2.12628
		2.66372	2.02485		1.93581	2.31757	2.54453
		1.96386	1.84298		1.62386	2.86317	2.51738
		2.17678	1.72308		1.53578	2.57448	1.70292
		2.26596	1.83846		2.57422	2.17451	2.38887
		2.70942	2.2908			2.90484	2.29381
		2.31708	2.13858			2.10656	3.43298
		2.66831	1.60663			1.9054	2.47125
		2.24465	2.19484			2.52456	2.67423
		2.51738	2.13465			2.23985	2.74675
		2.19273	1.70683			2.45365	2.31159
		2.36036	2.10656			2.58655	2.03339
		2.62855	2.07734			2.76506	2.74047
		2.36048	2.24649			2.18644	2.8755
		1.90184	2.15618			3.12008	2.89827
		1.78683	2.17835			2.96687	2.91107
		2.22659	1.67449			2.32364	2.54046
		2.1728	3.0194			2.77138	2.68853
		2.56264	2.55647			2.18458	2.24161
		2.574	1.48782			1.47182	2.1097
			1.92208			1.48182	2.97977
			2.06032			2.05983	2.31722
			2.35028			1.43153	2.20125
			4.25064			1.29939	2.70383
			2.22659			2.20251	3.21817
			3.13464			1.75105	2.78015
			2.78687			1.9297	2.72666
			2.86492			1.73403	2.30174
			2.36072			2.20018	2.58422
			2.79447			2.40385	2.49761
			2.32667				2.74617
			1.76111				2.88899
			2.39358				2.73043
			2.04469				3.98413
			2.12628				2.59599
			2.54453				3.00824
			2.51738				2.87514
			1.70292				2.85013
			2.38887				2.36828
			2.29381				2.82305
			1.43298				2.01361
			2.47125				2.74644
			2.67423				2.11774
			2.74675				3.84416
			2.31159				1.75344
			2.03339				2.75657
			2.74047				2.54074
			2.8755				2.47924
			2.89827				1.88079
			2.91107				2.42336
			2.54046				3.0906
			2.68853
			2.24161
			2.1097

## Sheet: Rrm4 and Upa1 velocity S7C Fig
Distancies of Rrm4-Kat and Upa1-Gfp signals shown in S7C Figure
Distance [µm]	Rrm4-Kat signals				Upa1-Gfp signals
	upa1-gfp/rrm4-kat	upa1-gfp/rrm4-m1D-kat	upa1-gfp/rrm4-m2D-kat	upa1-gfp/rrm4-m3D-kat	upa1-gfp/rrm4-kat	upa1-gfp/rrm4-m1D-kat	upa1-gfp/rrm4-m2D-kat	upa1-gfp/rrm4-m3D-kat
	15.8889	24.6587	13.3095		21.5635	28.4762	21.7698	11.9682		Replicate 1
	11.4603	24.0397	5.36508		14.3413	27.8571	14.4444	25.1746		Replicate 2
	6.29365	21.5635	16.1984		27.7381	16.4048	14.6508	18.1587		Replicate 3
	7.63492	14.754	17.9524		7.84127	9.90476	9.38889	18.1459
	13.8254	9.07936	12.381		17.5397	14.2381	6.9127	11.4524
	5.57143	6.5	12.6905		10.2143	10.5238	9.59524	8.86508
	5.46825	10.9365	11.6587		12.0714	14.9603	14.6508	7.3254
	6.80952	10.7302	11.7619		14.4444	14.2381	12.5873	8.76984
	14.3413	5.57143	14.5476		9.28571	10.5238	14.3413	9.59524
	12.0714	9.59524	8.87302		9.90476	7.3254	7.7381	12.8571
	9.90476	10.2143	6.5		7.7381	14.5476	6.19048	17.746
	10.7302	8.15079	9.07936		7.7381	13.5159	7.7381	12.4841
	6.70635	28.4762	6.80952		5.46825	8.97619	15.7857	10.2143
	9.90476	27.8571	7.84127		6.39682	7.7381	8.46032	13.4127
	6.39682	16.4048	12.8968		10.7302	29.8175	13.1032	14.1349
	5.6746	9.90476	6.80952		5.05556	31.7778	7.94444	18.3651
	6.0873	14.2381	5.88095		8.04762	15.0635	14.8571	7.56349
	6.80952	10.5238	7.01587		6.70635	25.0714	19.3968	15.2698
	9.28571	14.9603	13.619		9.90476	27.9603	15.8889	14.5476
	10.0079	14.2381	8.66667		6.39682	13.8254	12.8968	11.4524
	9.07936	10.5238	6.5		5.6746	10.0079	12.6905	13.9286
	9.18254	7.3254	21.7698		7.84127	7.84127	8.15079	11.9682
	13.1032	14.5476	24.4444		9.80159	7.11905	6.60317	18.9841
	17.4365	13.5159	14.6508		16.0873	6.80952	8.76984	20.4286
	8.97619	8.97619	9.38889		6.70635	10.5238	11.246	17.2302
	10.4444	7.7381	6.9127		26.9127	7.11905	5.2619	10.7381
	9.28571	9.81746	9.59524		9.80159	8.15079	7.94444	12.8968
	13.9286	31.7778	14.6508		10.1111	28.4762	7.63492	14.0318
	8.04762	15.0635	12.5873		8.15079	28.8889	9.28571	8.76984
	6.19048	25.0714	14.3413		6.29365	28.0635	8.66667	6.70635
	7.94444	27.9603	7.7381		25.4683	18.1587	8.66542	5.2619
	8.25397	13.8254	6.19048		6.80952	15.7857	5.15873	19.8095
	7.53175	10.0079	7.7381		17.2222	5.05556	7.11905	11.9682
	8.97619	7.84127	15.7857		5.36508	8.25397	6.19048	18.6746
	8.04762	7.11905	28.4603		13.9286	12.7936	6.80952	10.5238
	10.5238	6.80952	13.1032		13.4127	6.80952	8.46032	12.6905
	8.16667	10.5238	7.94444		18.3651	11.3492	14.3413	25.6905
	14.0318	7.11905	14.8571		20.8413	17.5397	15.5794	24.0397
	9.38889	8.15079	19.3968		17.746	14.3413	7.42857	17.3333
	19.1905	28.4762	15.8889		23.5698	25.7936	11.5556	14.4444
	13.4127	28.8889	12.8968		8.87302	18.2619	7.63492	12.2778
	12.8016	28.0635	12.6905		26.2576	11.5556	7.11905	16.3016
	11.3492	18.1587	8.15079		13.2064	10.9365	15.9921	7.22222
	16.9206	15.7857	6.60317		9.07936	7.01587	12.0714	14.2336
	11.1429	5.05556	8.76984		8.04762	9.49206	8.66667	8.76984
	7.11905	8.25397	11.246		8.15079	8.76984	5.05556	26.8254
	8.35714	12.7936	25.2619		9.28571	10.3175	7.01587	11.7619
	8.35714	6.80952	7.94444		29.8016	10.2143	15.7857	16.7143
	5.15873	11.3492	7.63492		20.6349	7.94444	33.6349	9.90476
	8.46032	17.5397	9.28571		10.0079	11.4524	29.3016	5.15873
	8.56349	14.3413	8.74263		16.9206	14.3413	33.8413	5.36508
	10.373	25.7936	8.66667		13.2064	7.94444	9.38889	11.5556
	13.1032	18.2619	5.15873		15.373	9.07936	8.66667	11.0397
	10.4206	11.5556	7.11905		8.66667	6.0873	8.56349	9.28571
	12.1746	10.9365	6.19048		7.3254	5.6746	9.90476	9.18254
	5.6746	7.01587	6.80952		7.84127	9.18254	20.1191	11.9682
	8.35714	9.49206	8.46032		9.07936	6.70635	16.3016	18.9841
	5.36508	8.76984	14.3413		8.46032	11.3492	9.59524	12.4841
	5.98413	10.3175	15.5794		7.42857	12.8968	10.627	20.2222
	8.57143	10.2143	7.42857		9.18254	21.254	17.2302	18.2619
	12.381	7.94444	11.5556		13.1032	14.4444	25.8968	14.8571
	11.5556	11.4524	7.63492		17.4365	18.7778	32.9127	17.6429
	5.36508	14.3413	7.11905		8.97619	15.0635	18.6746	22.6984
	10.2143	7.94444	15.9921		14.4444	9.80159	21.6667	15.1667
	8.15079	9.07936	12.0714		9.28571	10.8333	13.619	15.7857
	7.33333	6.0873	8.66667		13.9286	27.4444	9.28571	7.11905
	11.9682	5.6746	25.0556		8.04762	6.9127	10.7302	5.15873
	18.3651	9.18254	7.01587		6.19048	7.94444	11.0397	11.1429
	11.5556	6.70635	15.7857		7.94444	5.77778	9.28571	31.3651
	16.0952	11.3492	33.6349		8.25397	9.49206	7.63492	28.1667
	10.1111	12.8968	29.3016		7.53175	13.4127	9.07936	9.80159
	10.2143	21.254	33.8413		8.97619	9.49206	25.1746	11.8651
	9.28571	14.4444	9.38889		8.15079	12.5873	16.7143	9.28571
	14.8651	18.7778	8.66667		5.2619	33.3254	30.127	9.07936
	17.2302	15.0635	8.56349		15.6746	9.18254	24.9683	13.1032
	9.80159	9.80159	9.90476		5.2619	6.39682	18.9841	8.76984
	8.56349	10.8333	20.1191		10.2143	5.98413	18.4683	11.246
	7.3254	27.4444	16.3016		17.6349	28.9921	16.8175	11.4524
	10.8333	6.9127	9.59524		8.04762	18.1587	14.8571	9.28571
	8.87302	7.94444	10.627		10.5238	21.7698	10.4206	13.7222
	26.1032	5.77778	17.2302		28.1667	18.0556	12.1746	10.8333
	5.46825	9.49206	25.8968		14.0318	14.0318	9.80159	17.6429
	6.0873	13.4127	32.9127		6.9127	9.49206	12.7936	18.0556
	6.0873	9.49206	18.6746		10.0079	13.3095	18.5714	17.127
	12.381	12.5873	21.6667		8.46032	16.4048	14.6508	14.0318
	8.04762	33.3254	13.619		26.6032	13.2064	7.42857	13.619
	8.15079	9.18254	9.28571		6.0873	8.04762	5.6746	31.0556
	5.46825	6.39682	10.7302		7.53175	17.4365	10.7302	29.1984
	8.21429	5.98413	11.0397		9.38889	15.5794	14.5476	18.9841
	10.0079	28.9921	9.28571		7.11905	6.70635	11.5556	19.6032
	4.33333	18.1587	7.63492		9.49206	32.6032	5.98413	10.7302
	7.01587	21.7698	9.07936		19.1905	27.3413	27.9603	14.754
	13.8254	18.0556	25.1746		13.4127	18.8809	23.8333	8.66667
	10.4206	14.0318	16.7143		22.8016	26.7222	19.9127	9.07936
	8.46032	9.49206	30.127		11.3492	16.8175	22.9048	16.3016
	6.60317	13.3095	24.9683		16.9206	16.6111	16.1984	18.9841
	5.2619	16.4048	18.9841		11.1429	17.0238	14.0318	10.746
	10.0079	13.2064	18.4683		7.11905	9.49206	12.0714	19.7064
	9.38889	8.04762	16.8175		8.35714	11.0397	10.2143	14.754
	7.22222	17.4365	14.8571		8.46032	12.0714	13.7222	15.2698
	11.1587	15.5794	10.4206		14.754	10.7302	8.87302	12.381
	13.2143	6.70635	12.1746		7.84127	12.381	6.5	8.15079
	20.5317	32.6032	9.80159		26.8095	5.77778	5.98413	5.57143
	18.6746	27.3413	12.7936		8.56349	14.0318	5.98413	10.0079
	16.4048	18.8809	18.5714		9.59524	5.57143	16.0952	13.8254
	17.4365	26.7222	14.6508		11.4524	18.2619	10.3175	6.60317
	6.39682	16.8175	7.42857		8.35714	7.3254	5.88095	5.98413
	10.9365	16.6111	5.6746		8.04762	22.5952	13.1032	9.59524
	10.8413	17.0238	10.7302		26.6032	19.0873	7.01587	9.80159
	13.2064	9.49206	14.5476		12.8968	18.2619	19.9127	10.5238
	5.77778	11.0397	11.5556		18.9841	14.754	20.7381	8.76984
	14.5476	12.0714	5.98413		16.9206	8.56349	18.1587	10.3175
	16.5079	10.7302	27.9603		8.15079	17.746	24.0397	5.57143
	9.38889	12.381	23.8333		5.15873	12.6905	20.6349	17.746
	10.0079	5.77778	19.9127		5.15873	11.6587	8.35714	17.746
	14.6508	14.0318	22.9048		6.39682	11.0397	7.94444	24.1429
	6.0873	5.57143	16.1984		8.46032	18.8809	15.0635	17.6429
	6.80952	18.2619	14.0318		8.35714	11.9682	11.0397	11.4841
	11.6667	7.3254	12.0714		6.80952	13.2064	16.3016	20.8413
	19.1905	22.5952	10.2143		8.56349	5.05556	8.76984	10.9365
	13.5159	19.0873	13.7222		6.39682	5.36508	6.9127	15.7857
	17.4286	18.2619	8.87302		16.5563	16.9206	8.97619	11.7619
	5.2684	14.754	6.5		7.84127	13	9.69841	10.4206
	13.1111	8.56349	5.98413		17.6429	11.4524	13.4127	5.46825
	19.6032	17.746	5.98413		11.4524	23.0079	13.4127	9.90476
	14.5476	12.6905	16.0952		5.6746	12.4841	13.8254	12.381
	6.9127	11.6587	10.3175		12.4841	18.3651	12.7936	6.80952
	6.9127	11.0397	5.88095		7.7381	11.8651	6.60317	10.3175
	13.7222	18.8809	13.1032		15.373	13.3095	12.7936	6.80952
	15.4762	11.9682	7.01587		13.1032	12.6905	21.254	13
	7.7381	13.2064	19.9127		10.4206	6.29365	19.6032	28.7857
	6.39682	5.05556	20.7381		12.1746	15.5794	20.1191	14.127
	14.754	5.36508	18.1587		5.6746	15.9921	8.76984	19.7064
	5.77778	16.9206	24.0397		8.35714	10.8333	7.94444	22.5952
	5.07143	13	20.6349		5.36508	9.28571	14.4444	12.7936
	16.0952	11.4524	8.35714		5.98413	14.5476	14.6508	16.4048
	16.4048	23.0079	7.94444		12.5873	11.8651	14.6508	17.9524
	10.6349	12.4841	15.0635		10.7302	10.3175	14.1349	9.28571
	4.33333	18.3651	11.0397		19.7064	10.627	15.9921	14.9603
	9.38889	11.8651	16.3016		18.5714	19.1905	15.0635	12.7936
	11.6587	13.3095	8.76984		15.8889	24.7619	5.57143	11.1429
	17.746	12.6905	6.9127		11.9682	24.0397	8.76984	10.3175
	17.7745	6.29365	8.97619		19.0873	16.3016	5.2619	12.6905
	10.9365	15.5794	9.69841		21.3571	13	8.87302	25.6905
	14.2381	15.9921	13.4127		12.381	5.98413	8.87302	29.6111
	6.0873	10.8333	13.7856		11.5556	8.66667	7.84127	10.8333
	30.746	9.28571	13.8254		5.36508	10.3175	8.56349	14.9603
	24.7619	14.5476	12.7936		10.2143	11.4524	6.9127	13.3095
	21.9762	11.8651	6.60317		8.97619	9.38889	6.39682	11.9682
	7.54762	10.3175	12.7936		8.87302	3.92063	17.4365	5.77778
	9.38889	10.627	21.254		11.7619	11.9682	9.38889	9.28571
	6.39682	19.1905	19.6032		8.15079	13.8254	12.6905	12.2778
	10.4206	24.7619	20.1191		6.0873	13.8254	7.84127	8.46032
	15.373	24.0397	8.76984		6.29365	14.1349	13.2064	17.4365
	11.3492	16.3016	7.94444		7.63492	15.2698	10.7302	11.246
	11.9682	13	14.4444		22.9048	8.25397	6.29365	8.76984
	5.2619	5.98413	14.6508		13.619	14.4444	7.3254	10.2143
	10.3175	8.66667	14.6508		11.7619	12.8968	14.1349	10.2143
	10.2143	10.3175	14.1349		17.3333	18.8809	12.6905	10.5238
	7.63492	11.4524	15.9921		11.9682	20.0159	12.8968	5.36508
	8.57143	9.38889	15.0635		18.3651	16.4048	12.6905	13.1032
	8.76984	3.92063	5.57143		11.5556	8.76984	10.3175	13.5794
	3.71429	11.9682	8.76984		16.0952	12.8968	13.3095	20.3254
	11.3492	13.8254	5.2619		16.0952	9.07936	17.6429	9.49206
	6.29365	13.8254	8.87302		13.619	8.46032	17.5397	9.49206
	5.6746	14.1349	8.87302		10.9365	7.7381	21.0476	9.90476
	12.7936	15.2698	7.84127		6.29365	11.0397	20.3254	10.627
	11.6587	8.25397	8.56349		9.80159	8.35714	9.28571	6.9127
	13.3095	14.4444	6.9127		11.1429	11.246	13.619	12.6905
	13.4127	12.8968	6.39682		26.9286	7.84127	12.1746	8.51587
	11.246	18.8809	17.4365		21.254	12.6905	8.87302	23.8333
	17.746	20.0159	9.38889		10.1111	27.1349	11.1429	9.34921
	11.5556	16.4048	12.6905		6.29365	19.1905	12.7936	6.66667
	7.94444	8.76984	7.84127		8.35714	7.63492	15.7857	17.9524
	14.9603	12.8968	13.2064		9.07936	14.1349	7.53175	10.2143
	10.0079	9.07936	10.7302		10.2143	9.90476	19.6032	11.5556
	5.59524	8.46032	6.29365		7.7381	7.7381	14.4444	17.2302
	6.9127	7.7381	7.3254		7.11905	5.88095	9.18254	18.1587
	16.1984	11.0397	14.1349		9.28571	8.76984	9.18254	6.5
	13.619	8.35714	12.6905		8.46032	6.80952	8.76984	10.7302
	11.0397	11.246	12.8968		8.97619	24.8651	5.15873	13.3095
	11.7619	7.84127	12.6905		24.8651	16.7143	11.8651	14.1349
	11.7619	12.6905	10.3175		17.2302	13.4127	15.5794	6.61905
	9.38889	27.1349	13.3095		9.80159	11.1429	7.94444	5.05556
	8.46032	19.1905	17.6429		13.3095	12.2778	10.8333	26.8254
	9.80159	7.63492	17.5397		10.5238	15.2698	10.9365	8.59524
	10.8333	14.1349	21.0476		16.6111	18.0556	16.8175	16.0952
	12.8968	9.90476	20.3254		14.6508	13.1032	7.53175	19.6032
	19.6032	7.7381	9.28571		14.3413	28.9921	5.88095	14.1349
	8.66667	5.88095	13.619		8.56349	14.2381	22.3889	16.3016
	5.77778	8.76984	12.1746		4.84921	17.6429	18.4683	7.63492
	6.0873	6.80952	8.87302		6.60317	11.3492	17.5397	11.4524
	6.60317	24.8651	11.1429		11.6587	8.25397	8.46032	11.3492
	8.76984	16.7143	12.7936		16.6802	10.8333	13.9286	10.3175
	8.87302	13.4127	15.7857		7.3254	14.9603	8.04762	6.5
	7.42857	11.1429	7.53175		10.8333	11.3492	13.4127	33.8413
	6.0873	12.2778	19.6032		8.87302	9.38889	11.7619	19.8095
	6.0873	15.2698	14.4444		26.1032	17.3333	5.98413	15.246
	12.381	18.0556	9.18254		21.7698	12.2778	13.9286	9.38889
	8.04762	13.1032	9.18254		12.7936	25.7936	12.0714	19.5
	8.15079	28.9921	8.76984		13.5159	24.7619	9.90476	23.0079
	5.46825	14.2381	5.15873		8.66667	24.8651	12.6905	17.2302
	10.2143	17.6429	11.8651		10.1111	15.0635	13.8254	22.2857
	10.0079	11.3492	15.5794		5.46825	21.6667	13.3095	15.4762
	4.33333	8.25397	7.94444		9.90476	16.4048	6.9127	12.2778
	7.01587	10.8333	10.8333		8.66667	16.4048	5.36508	14.9603
	6.60317	14.9603	10.9365		6.0873	12.0714	15.373	22.1825
	15.4762	11.3492	16.8175		6.60317	17.8492	5.46825	5.46825
	9.80159	9.38889	7.53175		8.76984	8.46032	8.87302	8.46032
	8.46032	17.3333	5.88095		8.87302	6.5	14.1349	14.6508
	6.9127	12.2778	22.3889		7.42857	5.98413	5.5714	7.84127
	5.2619	25.7936	18.4683		6.0873	7.7381	12.5873	6.29365
	6.80952	24.7619	17.5397		6.0873	6.39682	15.4762	19.7064
	11.7619	24.8651	8.46032		12.381	8.76984	30.0238	12.1746
	7.12698	15.0635	13.9286		8.04762	6.0873	10.2143	12.5873
	5.57143	21.6667	8.04762		8.15079	17.5397	24.0397	12.7936
	13.7222	16.4048	13.4127		5.46825	26.6191	7.01587	13.3095
	16.9206	16.4048	11.7619		10.2143	8.46032	13.2064	9.59524
	11.6587	12.0714	5.98413		10.0079	14.754	13	6.39682
	13.8254	17.8492	13.9286		4.33333	16.8175	11.9682	10.3175
	10.4206	8.46032	12.0714		7.01587	15.8889	5.05556
	8.46032	6.5	9.90476		6.60317	8.56349	15.2698
	6.60317	5.98413	12.6905		15.4762	8.97619	8.25397
	5.2619	7.7381	13.8254		9.80159	10.627	10.4206
	10.0079	6.39682	13.3095		8.46032	6.5	7.94444
	9.38889	8.76984	6.9127		6.9127	30.5397	17.0238
	7.22222	6.0873	5.36508		5.2619	23.7302	6.9127
	31.1587	17.5397	15.373		6.80952	19.2936	26
	23.2143	26.6191	5.46825		11.7619	13	15.6825
	20.5317	8.46032	8.87302		17.127	27.0317	15.1667
	12.5952	14.754	14.1349		5.57143	18.8809	15.2698
	12.381	16.8175	5.5714		13.7222	15.7857	8.66667
	11.246	15.8889	12.5873		16.9206	6.60317	14.0318
	7.22222	8.56349	15.4762		11.6587	5.57143	10.2143
	8.87302	8.97619	30.0238		13.8254	5.2619	6.39682
	12.1746	10.627	10.2143		10.4206	6.5	6.5
	7.84127	6.5	24.0397		8.46032	6.60317	5.15873
	5.15873	30.5397	7.01587		6.60317	9.90476	8.35714
	7.7381	23.7302	13.2064		5.2619	25.4841	14.754
	16.1984	19.2936	13		10.0079	16.5079	11.7619
	14.2381	13	11.9682		9.38889	25.6905	13.7222
	16.1032	27.0317	5.05556		7.22222	34.5635	10.0079
	18.6746	18.8809	15.2698		31.1587	14.5476	13.2064
	18.7857	15.7857	8.25397		23.2143	20.2222	11.8651
	14.1349	6.60317	10.4206		20.5317	11.8651	6.29365
	16.4048	5.57143	7.94444		22.5952	32.0873	8.15079
	5.77778	5.2619	17.0238		12.381	24.4524	12.4841
	16.3016	6.5	6.9127		11.246	10.5238	26.7222
	7.3254	6.60317	26		7.22222	14.9603	18.3651
	14.8571	9.90476	15.6825		8.87302	9.18254	16.4048
	16.6111	25.4841	15.1667		12.1746	8.76984	9.07936
	9.71428	16.5079	15.2698		7.84127	7.3254	12.381
	17.4365	25.6905	8.66667		5.15873	6.80952	15.0635
	25.8968	34.5635	14.0318		7.7381	9.38889	12.2778
	8.87302	14.5476	10.2143		16.1984	27.5476	17.0238
	14.5476	20.2222	6.39682		14.2381	23.7302	6.70635
	7.7381	21.8651	6.5		26.1032	30.4365	4.33333
	5.05556	32.0873	5.15873		18.6746	15.8889	8.25397
	8.15079	24.4524	8.35714		28.7857	7.3254	5.2619
	6.39683	10.5238	14.754		14.1349	13.4127	14.5476
	10.9365	14.9603	11.7619		16.4048	14.8571	12.0714
	20.8413	9.18254	13.7222		5.77778	14.3413	13.3095
	13.2063	8.76984	10.0079		16.3016	9.38889	24.7619
	5.77778	7.3254	13.2064		7.3254	5.15873	22.8016
	14.5476	6.80952	11.8651		14.8571	6.5	18.8809
	19.0873	9.38889	6.29365		16.6111	7.11905	14.754
	6.20635	27.5476	8.15079		29.7143	10.4206	20.4286
	27.2381	23.7302	12.4841		17.4365	8.56349	11.1429
	17.8492	30.4365	26.7222		25.8968	24.9683	5.46825
	9.18254	15.8889	18.3651		8.87302	18.4683	9.28571
	7.94444	7.3254	16.4048		14.5476	20.7381	6.0873
	8.04762	13.4127	9.07936		7.7381	17.6429	11.1429
	7.84127	14.8571	12.381		5.05556	23.9365	11.3492
	12.4841	14.3413	15.0635		8.15079	22.8016	5.98413
	17.5397	9.38889	12.2778		6.39682	13.4127	7.42857
		5.15873	17.0238		10.9365	13.4127	9.28571
		16.4699	26.7063		20.8413	12.6905	8.46032
		7.11905	4.33333		13.2064	23.2064	8.35714
		10.4206	8.25397		5.77778	8.66667	9.38889
		8.56349	5.2619		14.5476	12.5873	9.18254
		24.9683	14.5476		19.0873	12.6905	6.19048
		18.4683	12.0714		26.2064	13.2064	23.4206
		20.7381	13.3095		27.2381	8.66667	23.0079
		17.6429	24.7619		17.8492	11.7619	25.1746
		23.9365	22.8016		9.18254	11.4524	16.6111
		22.8016	18.8809		7.94444	10.5238	14.5476
		13.4127	14.754		7.94444	13.9286	6.9127
		20.5496	20.4286		8.04762	8.97619	13
		12.6905	11.1429		7.84127	17.6429	10.627
		13.2064	5.46825		12.4841	8.97619	7.01587
		8.66667	9.28571		17.5397	9.18254	8.66667
		12.5873	6.0873		10.7302	10.5238	7.22222
		12.6905	11.1429		10.4206	24.5556	6.80952
		13.2064	11.3492		7.53175	22.0794	9.59524
		8.66667	5.98413		6.19048	11.3492	15.2698
		11.7619	7.42857		9.90476	7.94444	7.84127
		11.4524	9.28571		13.257	11.6587	7.84127
		10.5238	8.46032		23.2668	8.87302	9.38889
		13.9286	28.3571		9.18254	6.70635	3.30159
		8.97619	9.38889		8.76984	6.5	11.0397
		17.6429	9.18254		11.6587	13	11.1429
		8.97619	6.19048		9.07936	11.4524	5.36508
		9.18254	23.4206		11.7619	9.90476	11.0397
		10.5238	23.0079		8.46032	5.6746	11.7619
		24.5556	25.1746		30.2302	25.3809	31.4683
		22.0794	16.6111		29.1984	5.77778	29.3016
		11.3492	14.5476		29.1984	9.90476	20.3254
		7.94444	6.9127		25.5873	10.627	15.9921
		11.6587	13		13.2064	12.7936	18.4683
		8.87302	10.627		12.6905	5.46825	13.4127
		6.70635	7.01587		29.5698	11.7778	6.29365
		12.5678	8.66667		19.5	6.60317	10.8333
		13	7.22222		22.1825	26.7063	9.18254
		11.4524	6.80952		9.59524	7.94444	12.0714
		9.90476	9.59524		6.60317	11.8651	7.11905
		5.6746	15.2698		12.381	6.60317	23.3175
		25.3809	7.84127		12.1746	7.11905	12.1746
		5.77778	14.8413		12.8968	12.5873	13
		9.90476	9.38889		13.619	8.46032	30.8492
		10.627	3.30159		25.5873	11.5556	25.0714
		12.7936	21.1577		25.5873	10.5238	24.4524
		5.46825	11.1429		15.2698	6.5	21.254
		5.77778	5.36508		13	8.87302	13.2064
		6.60317	11.0397		17.3333	13.7222	9.69841
		6.70635	11.7619		16.5079	15.1667	11.3492
		7.94444	31.4683		9.38889	6.0873	11.6587
		11.8651	29.3016		10.0079	6.80952	18.8809
		6.60317	20.3254		14.6508	8.15079	16.0952
		7.11905	15.9921		6.0873	17.0238	20.3254
		12.5873	18.4683		6.80952	12.6905	12.4841
		8.46032	13.4127		21.6667	7.3254	13.619
		11.5556	6.29365		19.1905	7.53175	7.7381
		10.5238	10.8333		13.5159	12.2778	5.77778
		6.5	9.18254		7.42857	5.05556	25.0714
		8.87302	12.0714		13	10.2143	16.0952
		13.7222	7.11905		23.1111	5.77778	16.4048
		15.1667	23.3175		19.6032	6.70635	20.6349
		6.0873	12.1746		14.5476	6.29365	4.33333
		6.80952	20.2357		6.9127	7.84127	9.38889
		8.15079	7.22222		6.9127	9.07936	11.6587
		17.0238	8.56349		13.7222	14.754	17.746
		12.6905	9.59524		15.4762	13	17.746
		7.3254	6.80952		7.7381	23.57	10.9365
		7.53175	6.60317		6.39682	12.8968	14.2381
		12.2778	10.0079		14.754	5.57143	6.0873
		5.05556	5.46825			6.80952	30.746
		10.2143	7.01587			13.619	24.7619
		5.77778	5.05556			6.5	21.9762
		6.70635	7.94444			7.22222	27.5476
		6.29365	5.15873			8.56349	9.38889
		7.84127	18.3571			9.59524	6.39682
		9.07936	8.35714			6.80952	10.4206
		14.754	18.3257			6.60317	15.373
		12.5699	7.42857			10.0079	11.3492
		14.2569	10.2143			5.46825	11.9682
		12.8968	15.2698			7.01587	5.2619
		5.57143	7.01587			5.05556	10.3175
		6.80952	11.6587			7.94444	10.2143
		13.619	9.80159			5.15873	7.63492
		6.5	7.63492			8.35714	18.5714
			9.49206			8.35714	8.76984
			10.7302			8.76984	3.71429
			10.4206			7.42857	11.3492
			7.53175			10.2143	6.29365
			6.19048			15.2698	5.6746
			9.90476			7.01587	12.7936
			19.5			11.6587	11.6587
			13.2365			9.80159	13.3095
			9.18254			7.63492	13.4127
			8.76984			9.49206	11.246
			11.6587				17.746
			9.07936				11.5556
			11.7619				7.94444
			8.46032				14.9603
			30.2302				10.0079
			29.1984				9.59524
			29.1984				6.9127
			25.5873				16.1984
			13.2064				13.619
			12.6905				11.0397
			19.5				11.7619
			22.1825				11.7619
			13.2547				9.38889
			9.59524				8.46032
			6.60317				9.80159
			12.381				10.8333
			12.1746				12.8968
			12.8968				19.6032
			13.619				8.66667
			25.5873				5.77778
			25.5873				6.0873
			15.2698
			15.2367
			17.3333

## Sheet: Uni-bipolar Fig 5B
Unipolar/bipolar hyphae for Figure 5B
Total numbers	unipolar + septa			unipolar			bipolar + septa			bipolar
Repliacate	1	2	3	1	2	3	1	2	3	1	2	3
upa1-gfp/rrm4-kat	76	88	79	23	2	15	1	0	2	3	0	0
rrm4-m1,2D-kat/upa1-gfp	24	42	41	11	27	26	0	0	2	2	1	3
rrm4-m1,2D-kat/upa-pl1m-gfp	48	32	63	13	20	12	1	0	0	0	2	0
rrm4-m1,2D-kat/upa-pl2m-gfp	58	102	24	19	0	48	0	0	0	0	0	0
upa1D/rrm4-kat	9	0	9	64	25	89	6	3	9	8	45	53
upa1-pl1,2m-gfp/rrm4-kat	3	0	16	42	56	32	7	0	0	24	45	16
upa1-pl1,2m-gfp/rrm4-m1,2D-kat	20	5	10	83	75	92	0	10	10	49	40	51
										40
Percentage	unipolar + septa			unipolar			bipolar + septa			bipolar
Repliacate	1	2	3	1	2	3	1	2	3	1	2	3
upa1-gfp/rrm4-kat	73.7864	97.7778	82.2917	22.3301	2.22222	15.625	0.970874	0	2.08333	2.91262	0	0
rrm4-m1,2D-kat/upa1-gfp	64.86	60	56.94	29.73	38.57	36.11	0	0	2.78	5.41	1.43	4.17
rrm4-m1,2D-kat/upa-pl1m-gfp	77.42	59.26	84	20.97	37.04	16	1.61	0	0	0	3.7	0
rrm4-m1,2D-kat/upa-pl2m-gfp	75.32	100	33.33	24.68	0	66.66	0	0	0	0	0	0
upa1D/rrm4-kat	10.3	0	5.6	73.6	34.2	55.6	6.9	4.1	5.6	9.2	61.6	33.1
upa1-pl1,2m-gfp/rrm4-kat	3.95	0	25	55.26	55.4	50	9.21	0	0	31.58	44.55	25
upa1-pl1,2m-gfp/rrm4-m1,2D-kat	13.16	3.85	6.13	54.61	57.69	56.44	0	7.69	6.13	32.24	30.76	31.29

## Sheet: Aberrant staining Fig 5D
Hyphae with aberrant association of Rrm4 for Figure 5D
Total numbers	associated			not associated
Repliacate	1	2	3	1	2	3
upa1-gfp/rrm4-kat	0	0	0	15	25	31		shown in Figure 5D
upa1-gfp/rrm4-m1,2D-kat	0	0	0	5	8	16
rrm4-kat/upa1-pl1,2m-gfp	11	7	20	2	2	2
rrm4-kat/upa1D	14	6	12	0	2	3
upa1-pl1,2m-gfp/rrm4-m1,2D-kat	13	15	10	4	4	2
rrm4-kat/upa1-pl1m-gfp	0	1	1	17	25	11
rrm4-kat/upa1-pl2m-gfp	1	2	2	10	10	6
rrm4-m1,2D-kat/upa-pl1m-gfp	0	2	0	13	10	21
rrm4-m1,2D-kat/upa-pl2m-gfp	5	6	10	5	6	7
upa1-pl2m-gfp/rrm4-m1D-kat	1	3	6	10	27	34
upa1-pl2m-gfp/rrm4-m2D-kat	11	10	31	13	9	26
Percentage	associated			not associated
Repliacate	1	2	3	1	2	3
upa1-gfp/rrm4-kat	0	0	0	100	100	100
upa1-gfp/rrm4-m1,2D-kat	0	0	0	100	100	100
rrm4-kat/upa1-pl1,2m-gfp	84.61	77.78	90.9	15.38	22.22	9.09
rrm4-kat/upa1D	100	75	75	0	25	25
upa1-pl1,2m-gfp/rrm4-m1,2D-kat	76.47	78.94	83.33	23.53	21.05	16.67
rrm4-kat/upa1-pl1m-gfp	0	3.85	8.33	100	96.15	91.67
rrm4-kat/upa1-pl2m-gfp	9.09	16.67	25	90.91	83.33	75
rrm4-m1,2D-kat/upa-pl1m-gfp	0	16.67	0	100	83.33	100
rrm4-m1,2D-kat/upa-pl2m-gfp	50	50	58.82	50	50	41.18
upa1-pl2m-gfp/rrm4-m1D-kat	9.1	10	15	90.9	90	85
upa1-pl2m-gfp/rrm4-m2D-kat	45.8	52.6	54.4	54.2	47.4	45.6

## Sheet: Grey level int. Rrm4 Fig 5E
Grey level intensities in Rrm4 kymographs for Figure 5E
Grey level	upa1-gfp/rrm4-kat		upa1-pl1,2m-gfp/rrm4-m1,2D-kat		rrm4-m1,2D-kat/upa-pl1m-gfp		rrm4-m1,2D-kat/upa-pl2m-gfp		upa1-pl2m-gfp/rrm4-m1D-kat		upa1-pl2m-gfp/rrm4-m2D-kat
	Minimum	Maximum	Minimum	Maximum	Minimum	Maximum	Minimum	Maximum	Minimum	Maximum	Minimum	Maximum
	170	653	174	407	312	1257	157	545	150	627	194	548
	142	554	160	330	149	589	167	940	156	766	182	713
	163	474	172	415	166	795	173	634	180	517	196	380
	146	560	159	442	176	628	220	701	183	742	162	434
	153	483	169	327	159	952	175	518	126	956	184	426
	135	423	163	318	183	628	192	384	196	566	157	344
	139	489	164	319	149	463	195	582	136	498	187	409
	156	383	159	380	160	532	162	325	187	538	230	536
	142	485	157	312	230	566	165	350	131	1067	181	461
	167	349	159	259	179	634	183	558	175	676	173	386
	152	426	194	521	213	996	153	533	190	526	183	672
	153	733	198	471	181	714	156	366	200	321	172	462
	158	808	174	410	193	1036	146	363	160	278	159	400
	154	656	173	434	172	715	159	484	105	290	183	379
	216	611	179	362	224	798	163	450	150	443	156	295
	172	692	180	488	226	1062	156	442	151	313	153	322
	138	636	228	577	195	1137	151	343	190	254	154	268
	151	625	187	381	186	977	153	438	190	466	184	373
	153	733	178	357	188	848	165	557	102	658	182	679
	152	444	204	426	175	1018	161	316	127	495	157	370
	163	564	182	442	157	776	181	398	138	478	155	280
	218	905	171	432	247	1097	214	653	211	599	157	395
	139	608	185	349	157	986	171	436	154	674	172	645
	143	386	191	315	179	593	151	681	207	444	179	450
	163	572	167	320	169	558	159	529	160	459	154	384
	152	571	172	362	194	756	172	423	210	386	161	761
	158	519	156	334	222	1030	154	379	170	400	155	390
	150	624	169	330	168	659	176	543	180	329	158	384
	176	667	155	274	166	444	185	326	13	445	146	466
	164	890	180	293	191	1030	155	323	20	306	189	453
	217	658	182	448	181	599	145	353	167	530	149	377
	167	517	170	344	363	1016	187	484	162	816	145	429
	154	959	162	301	173	753	203	600	142	479	186	401
	146	622	157	279	202	651	174	587	153	476	147	284
	215	1473	154	358	174	497	204	587	155	641	153	241
	156	590	165	292	153	487	197	598	267	933	149	284
	160	953	172	346	163	458	227	587	186	589	153	276
	146	691	163	292	189	681	236	523	207	477	144	240
	180	687	164	405	169	521	168	380	145	619	153	263
	148	625	179	308	164	560	168	460	167	555	146	329
	164	998	150	304	151	534	249	505	146	617	150	327
	149	799	158	413	145	346	156	693	144	555	151	263
	176	611	173	394	167	536	168	581	155	616	141	227
	153	827	170	472	144	473	169	430	158	706	152	295
	148	988	166	465	142	565	164	383	159	576	223	492
	136	475	160	335	165	749	157	372	154	809	182	710
	168	713	167	286	146	645	156	592	149	549	196	657
	147	774	158	301	185	499	151	384	156	471	230	757
	178	842	149	316	144	454	171	433	165	414	193	468
	144	566	153	332	162	411	203	546	212	445	183	503
	146	588	168	585	161	510	153	408	160	545	174	426
	164	516	157	375	150	627	172	368	163	729	184	643
	153	743	177	333	136	413	153	413	160	683	223	432
	139	551	171	582	142	530	148	563	188	578	194	597
	145	873	187	444	182	803	157	397	163	474	174	498
	260	1158	149	230	265	970	166	604	167	784	190	517
	148	368	166	285	240	636	136	396	210	562	176	409
	161	592	174	471	196	418	155	413	185	471	148	432
	167	1143	188	581	147	412	153	407	189	568	163	454
	193	840	178	261	167	522	155	425	148	578	161	355
	180	1207	166	398	211	670	145	291	151	825	147	323
	148	512	201	409	183	484	152	332	180	1100	178	369
	154	785	228	520	166	755	149	357	166	1180	215	450
	205	660	197	401	188	688	171	498	169	696	156	325
	153	595	168	458	183	576	167	461	174	543	198	857
	149	735	152	345	180	959	168	464	185	457	240	884
	158	944	175	329	170	992	158	355	156	497	183	568
	217	711	145	441	185	999	174	308	175	576	200	571
	141	564	147	420	230	928	182	415	175	613	177	479
	177	914	148	280	136	788	163	318	178	580	157	476
	147	610	173	282	161	631	160	287	166	734	236	974
	183	473	155	279	164	886	157	247	181	494	193	482
	196	931	155	319	171	693	166	455	170	848	170	518
	163	567	149	290	213	737	185	579	202	992	193	479
	163	845	164	301	190	1083	150	501	190	682	169	495
	184	501	167	322	170	721	197	622	221	666	162	701
	179	547	179	275	152	574	178	640	178	701	182	550
	173	605	148	340	155	798	161	451	184	1183	171	494
	213	776	151	287	325	937	171	398	184	918	145	405
	197	637	157	277	264	982	169	344	170	628	191	461
	193	794	151	209	144	414	149	250	145	481	189	507
	187	623	166	395	165	542	143	348	151	805	145	441
	155	689	164	314	165	592	174	665	182	1018	149	346
	222	663	174	333	137	679	162	394	190	1023	165	395
	197	670	180	293	161	437	164	697	154	578	163	488
	168	565	149	295	158	590	150	571	145	703	200	555
	185	450	152	234	195	929	163	444	152	634	181	688
	160	903	157	262	173	696	159	450	175	502	196	542
	226	959	182	274	186	675	171	403	155	502	205	562
	144	914	167	286	168	669	162	461	192	476	209	471
	149	771	164	238	140	658	164	478	157	571	185	617
	204	820	164	279	165	627	159	434	145	325	223	566
	214	917	160	432	175	503	173	307	170	367	199	560
	150	659	180	330	164	559	163	379	134	488	266	600
	139	388	162	268	163	444	162	732	142	649	211	469

## Sheet: Uni-bipolar S8B Fig
Unipolar/bipolar hyphae for S8B Figure
Total numbers	unipolar + septa			unipolar			bipolar + septa			bipolar
Replicate	1	2	3	1	2	3	1	2	3	1	2	3
upa1-gfp/rrm4-kat	57	118	66	9	11	9	0	1	0	0	0	0
rrm4-kat/upa1-pl1m-gfp	72	110	59	1	2	4	0	0	0	0	0	0
rrm4-kat/upa1-pl2m-gfp	115	105	61	18	12	8	2	3	2	1	0	0
Percentage	unipolar + septa			unipolar			bipolar + septa			bipolar
Replicate	1	2	3	1	2	3	1	2	3	1	2	3
upa1-gfp/rrm4-kat	86.36	90.76	88	13.64	8.46	12	0	0.78	0	0	0	0
rrm4-kat/upa1-pl1m-gfp	98.63	98.21	93.65	1.37	1.79	6.35	0	0	0	0	0	0
rrm4-kat/upa1-pl2m-gfp	84.56	87.5	85.92	13.24	10	11.27	1.47	2.5	2.81	0.74	0	0

## Sheet: Rrm4 signals S8D Fig
Number of Rrm4-Kat signals shown in S8D Figure
Total signal number/ 10 µm	Rrm4-Kat signals
Replicate	upa1-gfp/rrm4-kat	upa1-gfp/rrm4-m1,2D-kat	rrm4-m1,2D-kat/upa1-pl1m-gfp	rrm4-m1,2D-kat/upa1-pl2m-gfp
1	6	8.66667	5.33333	4.66667
	7.14286	6.33333	7.66667	11
	7.42857	6	4.33333	10
	5.42857	4	8.66667	10.3333
2	7.14286	6.66667	8	6.66667
	5.14286	5.33333	7.66667	8.33333
	6.85714	9.33333	6.66667	6.33333
	4.28571	6.33333	10.3333	10.3333
3	6.28571	10.3333	5.33333	7.33333
	7.71429	7.33333	5	9.33333
	4	5	7	5
	6	7.67	8	8

[truncated: 6 more sheets: Rrm4 velociy S8D Fig, Rrm4 distance S8D Fig, Rrm4 signals S8E Fig, Rrm4 velocity S8E Fig, Rrm4 distance S8E Fig , Aberrant staining S10 Fig]
